# Supplementary figures and images for: Hydrothermal synthesis of divalent metal pyromellitate/dipyridylamine complexes: From an unprecedented supramolecular three-dimensional topology to an anionic coordination polymer framework with large incipient cation-bearing voids
Source: Royal Society of Chemistry journal article supplement (doi:10.1039/b712182b), 2007-09-24

TGA 1

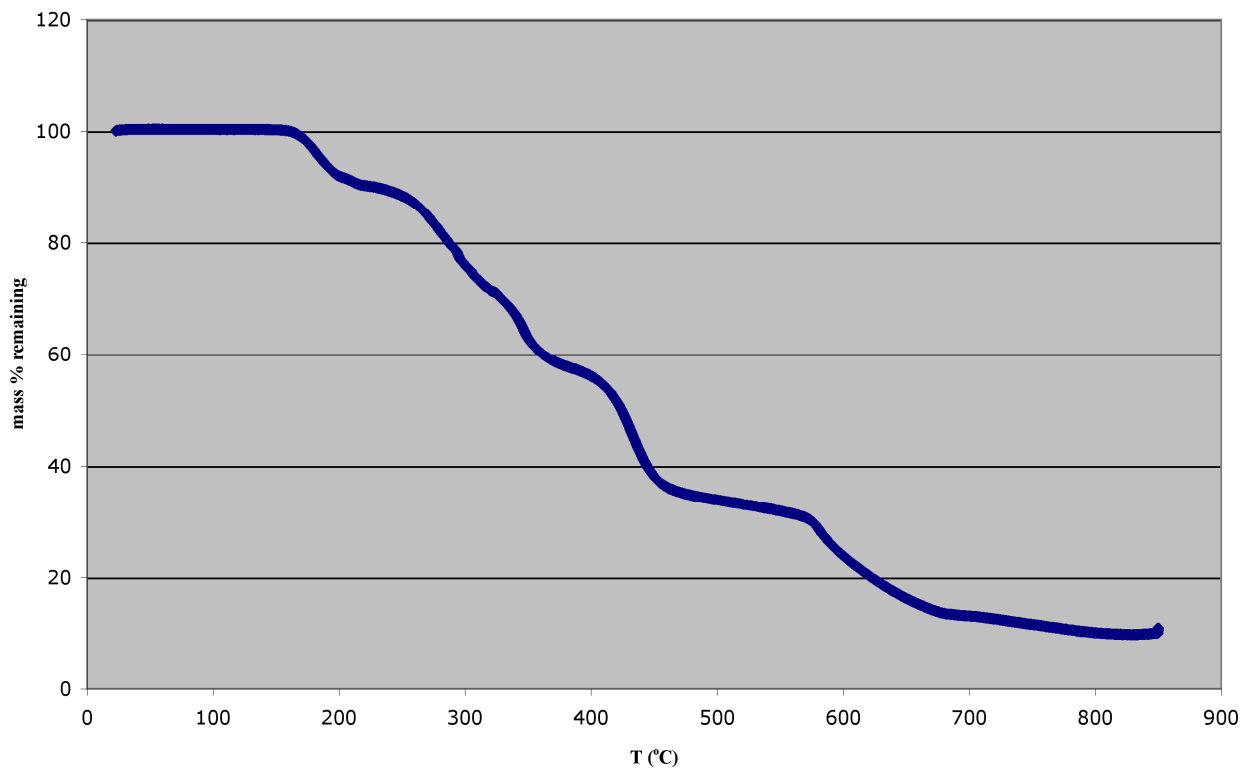

Fig S1

TGA 2

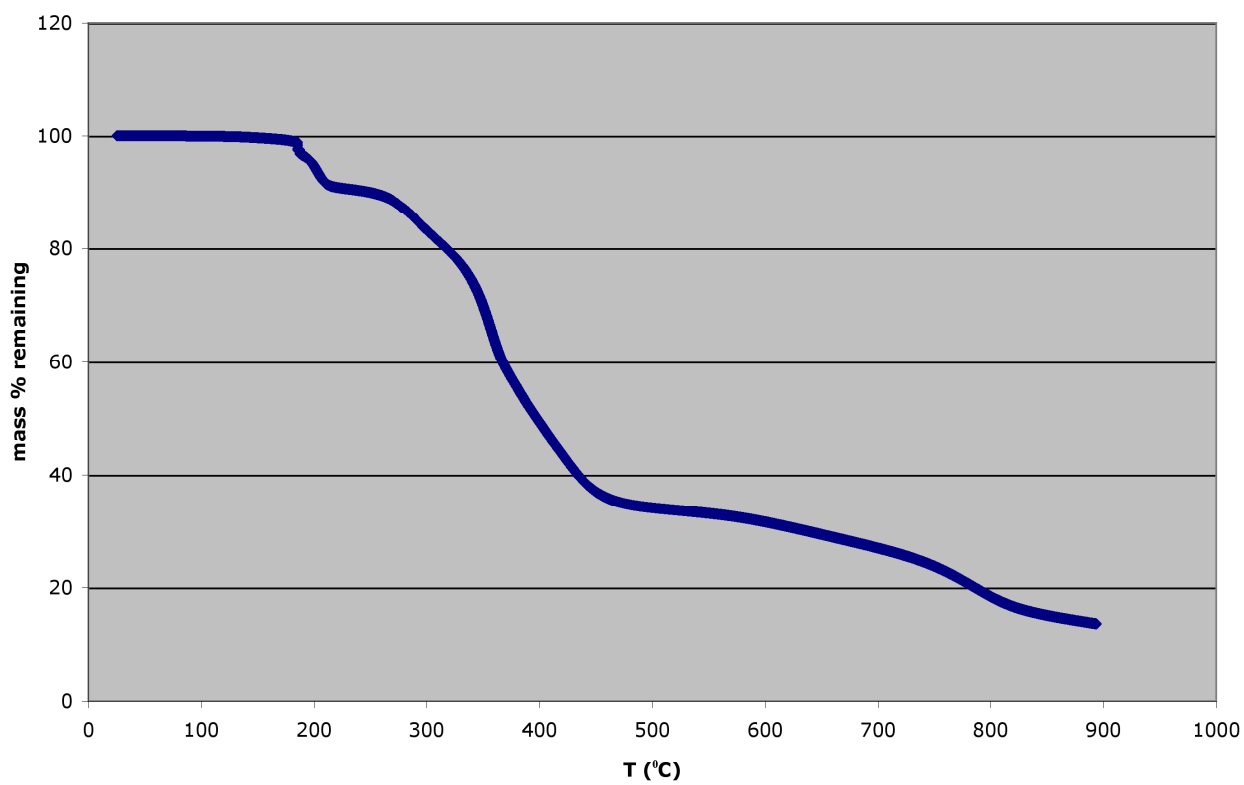

Fig S2

Supplement: b712182b.pdf [file b712182b.pdf]
